# Supplementary material
Source: publisher figshare collection journal article supplement (https://tandf.figshare.com/ndownloader/files/20160839)
Supplement: Supplementary file 1 [file 20160839]

First study of Rhodium(I) complexes with chiral sulfur-containing terpenoids as catalytic systems for ketone hydrosilylation

Vladimir M. Uvarova, Dimitry A. de Vekkia

aDepartment of Chemical Technology of Polymers. St. Petersburg State Instituteof Technology, St. Petersburg, Russia

Email: [vladi.uvarov@yandex.ru](mailto:vladi.uvarov@yandex.ru)

**Supplemental Materials**


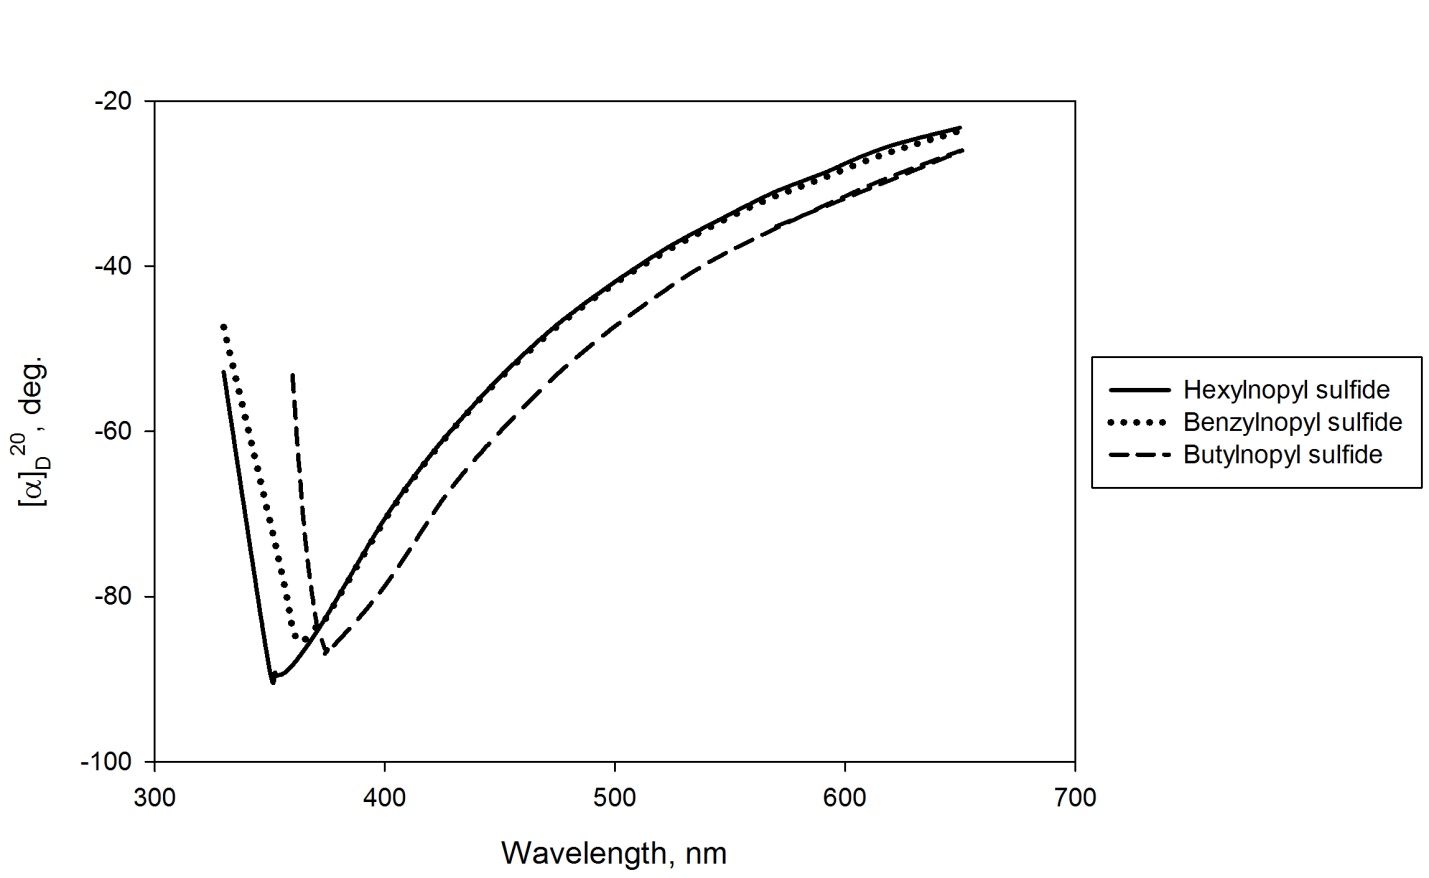


**Figure S 1:** Optical rotatory dispersion of (1*R*)-hexyl-, benzyl- and butylnopyl sulfides





**Figure S 2:** 1H NMR spectrum of (1*S*)-camphorsulfonic acid chloride





**Figure S 3:** 1H NMR spectrum of (1*S*)-10-camphorthiol





**Figure S 4:** 13С NMR spectrum of (1*S*)-10-camphorthiol





**Figure S 5:** 1H NMR spectrum of tosylate of (1*R*)-nopol





**Figure S 6:** 1H NMR spectrum of (1*R*)-butylnopyl sulfide





**Figure S 7:** 13C NMR spectrum of (1*R*)-butylnopyl sulfide





**Figure S 8:** 1H NMR spectrum of (1*R*)-hexylnopyl sulfide





**Figure S 7:** 13C NMR spectrum of (1*R*)-hexylnopyl sulfide





**Figure S 8:** 1H NMR spectrum of (1*R*)-benzylnopyl sulfide





**Figure S 9:** 13C NMR spectrum of (1*R*)-benzylnopyl sulfide


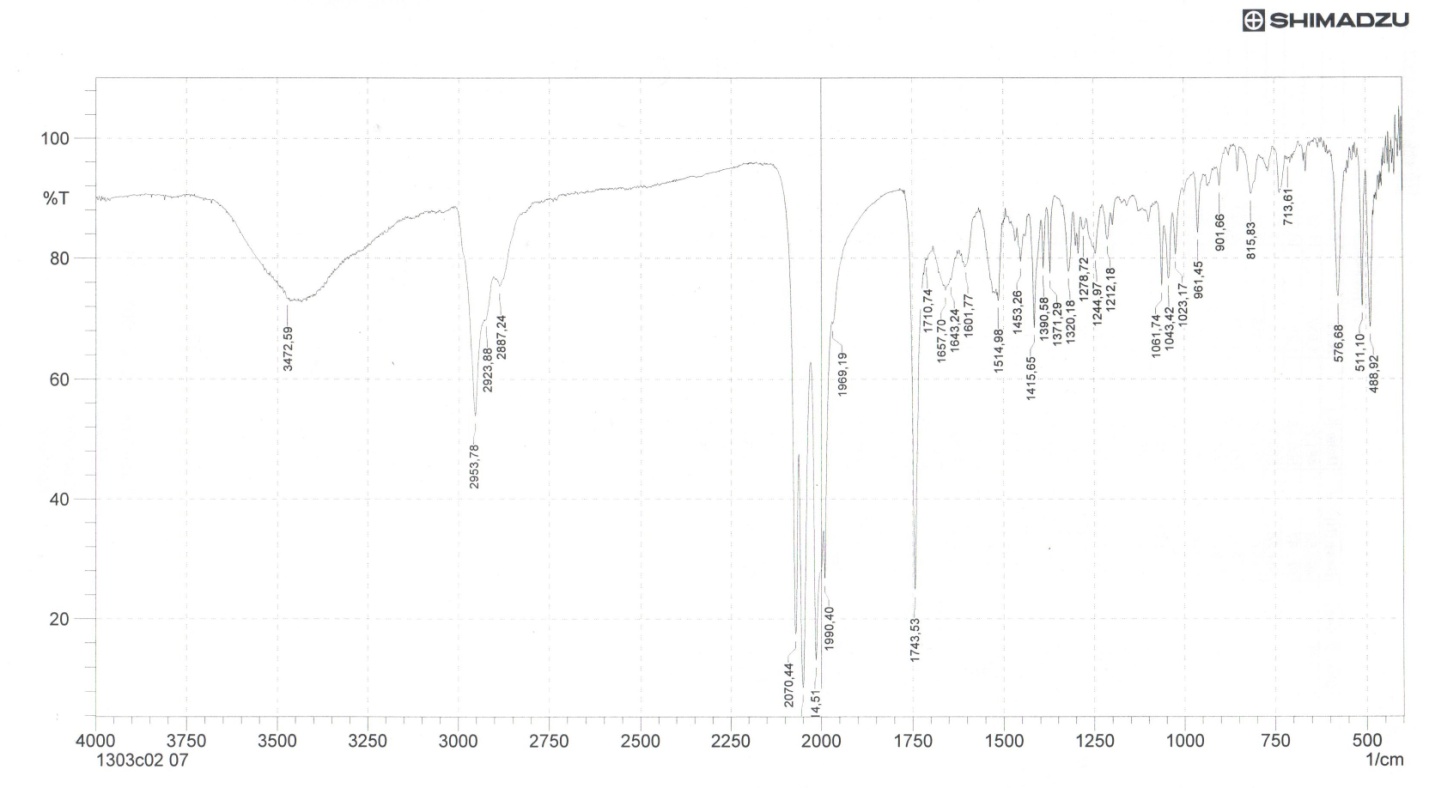


**Figure S 10:** IR spectrum of bis-*μ*-di[(+)-10-camphrothiolato]dicarbonylrhodium(I)


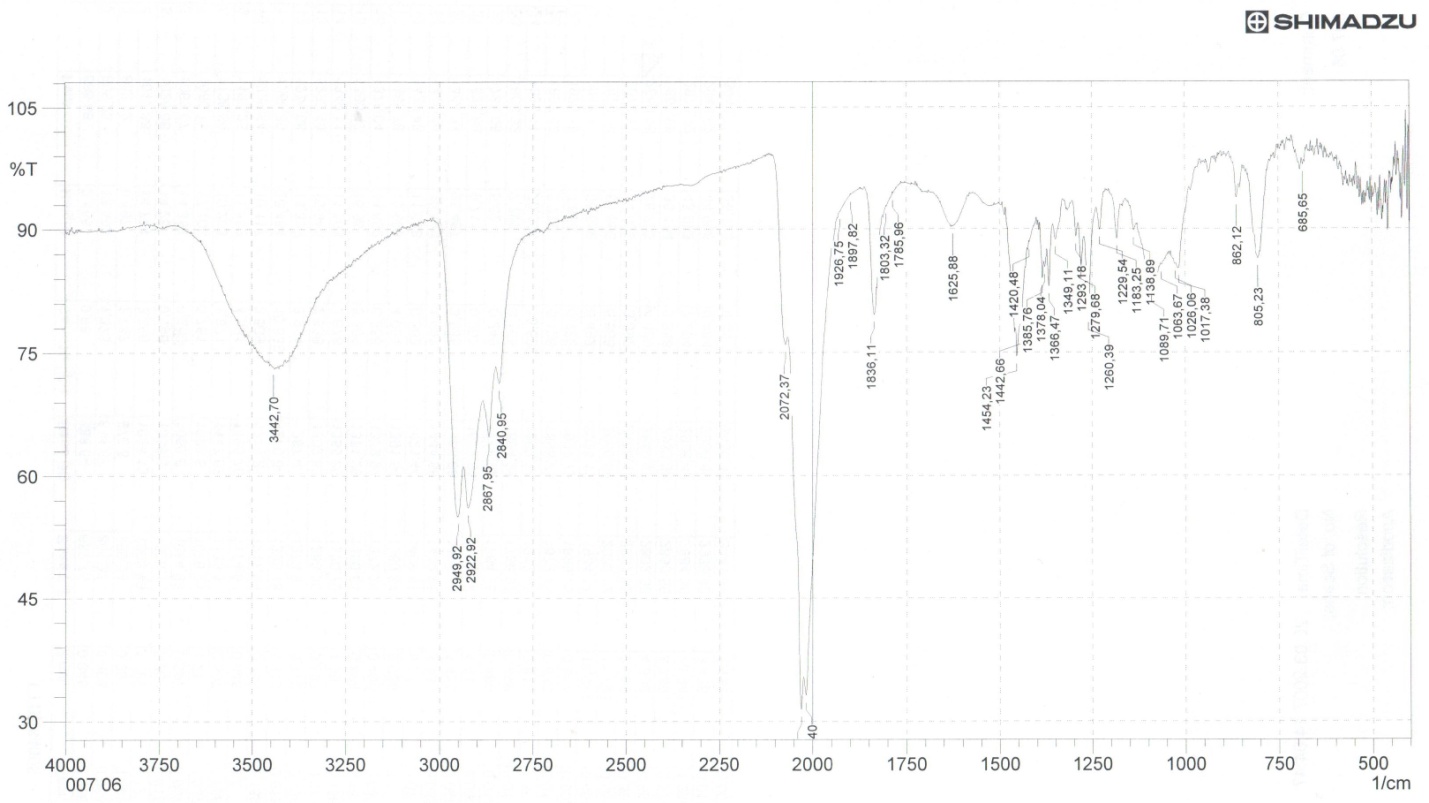


**Figure S 11:** IR spectrum of bis-μ-di[(+)-neomenthylthiolato]dicarbonylrhodium(I)





**Figure S 12:** 1H NMR spectrum of Bis-*μ*-di[(+)-10-camphrothiolato]dicarbonylrhodium(I)





**Figure S 13:** 13С NMR spectrum of Bis-*μ*-di[(+)-10-camphrothiolato]dicarbonylrhodium(I)
